1 **Oncoprotein 18 is necessary for malignant cell proliferation in bladder**  
2 **cancer cells and serves as a G3-specific non-invasive diagnostic marker**  
3 **candidate in urinary RNA**

4

5 Merle Hanke PhD<sup>1,2</sup>, [merle.hanke@gmx.de](mailto:merle.hanke@gmx.de), Josephine Dubois BSc<sup>1,3</sup>,  
6 [dubois@imm.uni-luebeck.de](mailto:dubois@imm.uni-luebeck.de), Ingo Kausch MD<sup>4</sup>, [kauschblecken@aol.com](mailto:kauschblecken@aol.com), Sonja  
7 Petkovic PhD<sup>1</sup>, [Sonja.petkovic@neuro.uni-luebeck.de](mailto:Sonja.petkovic@neuro.uni-luebeck.de), and Georg Sczakiel  
8 PhD<sup>1,\*</sup>, [sczakiel@imm.uni-luebeck.de](mailto:sczakiel@imm.uni-luebeck.de)

9

10 <sup>1</sup>Institut für Molekulare Medizin, Universität zu Lübeck and UKSH, Ratzeburger  
11 Allee 160, D-23538 Lübeck, Germany;<sup>2</sup> present address: coliquio GmbH, Turmstr.  
12 22, 78467 Konstanz, Germany; <sup>3</sup>Graduate School for Computing in Medicine &  
13 Life Sciences, Universität zu Lübeck, Ratzeburger Allee 160, D-23538 Lübeck,  
14 Germany.<sup>4</sup> Klinik für Urologie und Kinderurologie, Ammerland Klinik GmbH,  
15 Lange Straße 38, 26655 Westerstede, Germany.

16

17 \* to whom correspondence should be addressed:

18 Georg Sczakiel: E-mail: [sczakiel@imm.uni-luebeck.de](mailto:sczakiel@imm.uni-luebeck.de), Phone: +49-451-500-  
19 50801, fax: 0451 500 50804

20

21 **running head:** OP18-based tumor diagnostics and biology

22 **Keywords:** liquid biopsy; uroplakin 1A; siRNA; ECV-304; RT-4; theranostics;  
23 RNA marker; drug target

25 **ABSTRACT**

26 Background:

27 Urine-based diagnostics indicated involvement of OP18 in bladder cancer. In cell  
28 culture models we investigated the role of oncoprotein 18 for malignant cell  
29 growth.

30 Methods:

31 We analyzed 113 urine samples and investigated two human BCa cell lines as a  
32 dual model: RT-4 and ECV-304, which represented differentiated (G1) and poorly  
33 differentiated (G3) BCa. We designed specific siRNA for down-regulation of  
34 OP18 in both cell lines. Phenotypes were characterized by cell viability,  
35 proliferation, and expression of apoptosis-related genes. Besides, sensitivity to  
36 cisplatin treatment was evaluated.

37 Results:

38 Analysis of urine samples from patients with urothelial BCa revealed a significant  
39 correlation of the RNA-ratio oncoprotein 18:uropodkin 1A with bladder cancer.  
40 High urinary ratios were mainly found in moderately to poorly differentiated  
41 tumors (grade G2-3) that were muscle invasive (stage T2-3), whereas samples  
42 from patients with more differentiated non-invasive BCa (G1) showed low  
43 OP18:UPK1A RNA ratios. Down-regulation of OP18 expression in ECV-304  
44 shifted its phenotype towards G1 state. Further, OP18-directed siRNA induced  
45 apoptosis and increased chemo-sensitivity to cisplatin.

46 Conclusions:

47 This study provides conclusive experimental evidence for the link between OP18-  
48 derived RNA as a diagnostic marker for molecular staging of BCa in non-invasive  
49 urine-based diagnostics and the patho-mechanistic role of OP18 suggesting this  
50 gene as a therapeutic target.

## 52 **1 INTRODUCTION**

53

54 The treatment of bladder cancer (BCa) depends on its stage. While non-muscle  
55 invasive forms of BCa can be removed by TUR-B of tumor tissue and its  
56 recurrence can be treated by immunotherapy with intra-vesicular delivery of  
57 attenuated *Bacillus Calmette–Guérin* (BCG) or intra-vesical chemotherapy,  
58 muscle-invasive tumor forms demand more aggressive strategies. Chemotherapy  
59 includes platinum-based drugs like cis-diamminedichloridoplatinum(II),  
60 (henceforth referred to as cisplatin), as one of the standard chemotherapeutic  
61 agents for the treatment of metastatic BCa [1, 2].

62 The efficacy of a multiplicity of chemotherapeutic agents including cisplatin is  
63 often substantially decreased since BCa tumors frequently develop a drug- or  
64 multiple drug-resistance (MDR) mechanisms [3, 4]. Drug-resistant cells show,  
65 amongst others, an over-expression of anti-apoptotic genes [4]. Hence, the  
66 identification of new molecular targets and alternative classes of drugs, including  
67 oligonucleotide-based medications [5, 6], is crucial for the improvement of  
68 survival rates of patients with advanced BCa. There is a high clinical interest in  
69 objective and more accurate ways of tumor classification that may replace tissue-  
70 based histopathological staging. Innovative diagnostic approaches are  
71 increasingly based on the non-invasive monitoring of BCa-specific tumor markers  
72 in urine. Promising markers for bladder cancer had been based on RNA such as  
73 microRNAs and also sequences of cellular mRNAs [7-9]. Further, we showed that  
74 analysis of the RNA composition in whole urine of BCa patients reveals specific

75 and sensitive RNA-based tumor markers including ETS2 and uPA [10] as well as  
76 microRNAs [11].

77 In this study, we aimed to investigate whether differentially detectable RNAs  
78 in whole urine of BCa patients provide improved tumor markers *per se*. Further,  
79 we asked whether those RNA markers might display aberrant mRNA expression  
80 (of OP18) in malignant cells. We used two different BCa cell culture models to  
81 evaluate a possible involvement of OP18 gene expression in the tumorigenesis:  
82 The human cell lines ECV-304 [12-14] and RT-4 [15], representing well (G1) and  
83 poorly differentiated (G3) tumor states, respectively. To test whether model-based  
84 G1/G3-related phenotypes were in line with our results in liquid biopsies, we  
85 quantified RNA and protein levels of OP18 and performed several proliferation  
86 and cell viability assays under siRNA mediated suppression of OP18 mRNA. We  
87 also analyzed the influences of OP18 on apoptotic genes and chemo-sensitivity  
88 of G3 cells.

## 90 **2 MATERIALS AND METHODS**

91

### 92 **2.1 Clinical samples and preparation of RNAs**

93 This study was approved by the local ethical research committee in Lübeck. All  
94 urine samples were obtained with written informed consents of the participants.  
95 Tumor grading was determined by urinary bladder cystoscopy. In addition to  
96 biopsy, urine cytology was performed. All tumors identified were completely  
97 resected and classified pathologically according to the World Health Organization  
98 1973 grading and staging system. For investigation of urinary OP18 and  
99 uroplakin 1A (UPK1A) RNA levels, spontaneously voided urine of 113 donors  
100 was collected: 61 BCa patients (male:female, 3:1; G1 pTa, n = 13; G2+G3  
101 pTa+pTis, n = 19; G2+G3 pT1, n = 12; G2+G3 pT2+pT3, n = 17; median age, 71  
102 years), 37 healthy volunteers (male:female, 2:1; median age, 71 years), and 15  
103 patients with infections of the urinary tract (male:female, 1:7; median age, 55  
104 years). Urine samples were stabilized immediately as described recently [11].  
105 Total RNA from cells was prepared using the RNeasy Mini kit (Qiagen, Hilden,  
106 Germany), and urinary RNA was isolated using the RNeasy Midi Kit (Qiagen,  
107 Hilden, Germany), except for the lysis buffer described above which was used  
108 instead of buffer "RLT". RNA was eluted twice with 160 µl H<sub>2</sub>O and then  
109 lyophilized. Pellets were resolved in 20 µl H<sub>2</sub>O, and the quality of RNA was  
110 assessed by agarose gel electrophoresis (using 1 µg/ml ethidium bromide).  
111 Urinary RNA extract (10 µl) or 400 ng total RNA from cells were used for cDNA  
112 synthesis and minus reverse transcriptase (non-RT) reaction.

113

## 114 **2.2 cDNA synthesis**

115 Reverse transcription was performed in a total volume of 20 µl with RNA extract  
116 (10 µl), and 300 ng random hexamer primer (Invitrogen, Paisley, UK) following  
117 the manufacturer's instructions for SuperScript III™ driven reverse transcription  
118 (Invitrogen, Paisley, UK), despite a little increase of time and temperature for the  
119 denaturation 75°C and 10 min.

120

## 121 **2.3 Quantitative PCR (qPCR) and data analysis**

122 Primers and TaqMan® probes were designed using Primer Express® software  
123 version 2.0 (Applied Biosystems, Darmstadt, Germany) or Primer3 software  
124 (Steve Rozen, Whitehead Institute for Biomedical Research, Cambridge, UK) and  
125 were purchased from Metabion (Martinsried, Germany) and Eurogentec (Seraing,  
126 Belgium), respectively. Primer sequences were checked for homology using the  
127 Blast software ([www.ncbi.nlm.nih.gov/BLAST](http://www.ncbi.nlm.nih.gov/BLAST)). Amplicon characteristics and  
128 software information are listed in the S1 Table.

129 All reactions were performed with the qPCR Core Kit (Eurogentec, Seraing,  
130 Belgium) in a total reaction volume of 10 µl in 384-well plates. A non-template  
131 control (nuclease-free H<sub>2</sub>O) was included for each amplicon to exclude  
132 contamination in every qPCR run. Each qPCR reaction was performed in  
133 triplicate. Quantitative PCR was carried out in a 7900HT thermal cycler (Applied  
134 Biosystems, Darmstadt, Germany): initial denaturation at 95°C for 10 min,  
135 followed by 50 cycles at 95°C for 15 sec and 60°C for 60 sec. PCR products were

136 purified using the MinElute PCR Purification Kit (Qiagen, Hilden, Germany). Six  
137 serial 10-fold dilutions ( $10^1$ – $10^6$  copy numbers/reaction) were prepared in 10  
138 mmol/l Tris/HCl (pH 8.0), 10 ng/ml polyinosinic acid potassium salt to generate  
139 standard curves. Data analysis was performed via the SDS 2.1 software (Applied  
140 Biosystems, Darmstadt, Germany) and the *threshold cycle* (*Ct*) values of  
141 amplified targets were transformed into absolute RNA copy numbers using the  
142 standard curves.

143

#### 144 **2.4 Cell culture**

145 The human urinary BCa cell line ECV-304 was cultivated in Medium 199 (with  
146 HEPES buffer + Earle's salts) containing 10% (vol/vol) fetal calf serum (FCS  
147 Gold). ECV-304 was originally established from an invasive, G3 BCa of an 82  
148 years old Swedish female patient with a mutant p53 in 1970 and is a defined  
149 derivative of T-24 [12-14] (from DSMZ, ACC-310, cell identity was confirmed by  
150 DNA profiling in September 2017 by the DSMZ). RT-4 [15] (from DSMZ, ACC-  
151 412, purchased in March 2018) was cultivated in RPMI 1640 supplemented with  
152 10% (vol/vol) fetal calf serum and used as an *in vitro* model for differentiated G1  
153 BCa. Both cell lines grew without antibiotics in culture medium at 37°C and 5%  
154 CO<sub>2</sub> in a humidified incubator. All culture media and supplements were obtained  
155 from PAA Laboratories GmbH (Pasching, Austria). Control for Mycoplasma  
156 contamination was done using Venor®GeM Mycoplasma Detection Kit (Minerva  
157 Biolabs, Berlin Deutschland) according to manufacturer's protocol.



158

## 159 **2.5 Design and validation of siRNAs**

160 Two small interfering RNAs targeting OP18 mRNA were designed in silico  
161 according to a systematic computational analysis of local target mRNA structures  
162 as described previously [16]. An extensive BLAST search indicated that both  
163 siRNA sequences were target-specific. Nucleotide sequences of the effective  
164 siRNA and a scrambled control siRNA without homology to human sequences  
165 are shown in the S2 Table. For the annealing of RNA strands (from IBA  
166 Goettingen, Germany), 20  $\mu$ M of the sense and antisense strand, respectively,  
167 was denatured in buffer (50 mmol/l potassium acetate, 1 mmol/l magnesium  
168 acetate, 15 mmol/l HEPES (pH 7.4)) at 90°C for 2 min followed by an annealing  
169 step at 37°C for 1 h. For transfection of siRNA, cells were seeded into tissue  
170 culture plates (12-well: 5 x 10<sup>4</sup> ECV-304 cells or 8 x 10<sup>4</sup> RT-4 cells; 96-well plates:  
171 3 x 10<sup>3</sup> ECV-304 cells). After 24 h cells were transfected for 4 h at 37°C with 30  
172 nM of siRNA using Lipofectamine 2000 in OPTI-MEM I according to the  
173 manufacturer's instructions (Invitrogen, Paisley, UK).

174

## 175 **2.6 Phenotypic characterization and cell proliferation**

176 For analysis of cell proliferation post-transfection with siRNA (12-well plate, 8  
177 days, or in 96-well for 4 days) 3-5 x 10<sup>3</sup> ECV-304 cells or 1 x 10<sup>4</sup> RT-4 cells were  
178 seeded in 12-well plates with 1 ml of culture medium or 0.1 ml in 96-well plates,  
179 respectively. After 18-24 h, cells were transfected with siRNAs as described  
180 above. Every 2 days, 500  $\mu$ l for 12-well (and 50  $\mu$ l for 96-well) plates of culture

181 medium was replaced. At time points of measurement, cells were harvested, and  
182 trypan blue-negative cells were counted using a Neubauer hemocytometer  
183 (Sigma Aldrich, Steinheim, Germany).

184 At day 1, 2, 3 and 4, cell viability was determined using a tetrazolium salt-derived  
185 (3-(4,5-dimethylthiazol-2-yl)-2,5-diphenyltetrazolium bromide (MTS)) colorimetric  
186 assay. Cell culture medium was replaced by pH indicator-free culture medium  
187 containing 0.32 mg/ml MTS (Promega, Mannheim, Germany) and 0.0073 mg/ml  
188 phenazine methosulfate (Sigma-Aldrich). Cells were cultivated at 37 °C for 2.5 h  
189 and  $A_{490}$  was determined by a Tecan Sunrise ELISA reader (Tecan Deutschland  
190 GmbH, Crailsheim, Germany).

191 Chemo-sensitivity of ECV-304 cells after siRNA-mediated suppression of OP18  
192 was determined by treatment with cisplatin (Cisplatin-Teva®, Teva Pharma AG,  
193 Aesch, Switzerland) at 0, 1, 3, 6, 9, 12 µg/ml cisplatin over a period of 24 h  
194 starting at day 2 after transfection. Cell viability was determined using the MTS  
195 assay.

196

## 197 **2.7 Detection of apoptosis**

198 ECV-304 cells were seeded ( $3 \times 10^3$  cells, white-bottom 96-well plates) and  
199 transfected after 24 h. Caspase 3/7 activity, was determined at day 3 and 4 post-  
200 transfection using the Caspase-Glo 3/7 Assay (Promega, Mannheim, Germany).

201 The emerging fluorescence was detected ( $485_{Ex}/527_{Em}$ ; Labsystems Fluoroscan  
202 Ascent, Helsinki, Finland), caspase 3/7 substrate was added, and

203 bioluminescence detected after incubation at room temperature for approximately  
204 2.5 h and normalized to cell viability.

205

## 206 **2.8 Western blot analysis**

207 ECV-304 cells were seeded in 12-well plates ( $5 \times 10^4$  cells/well) and transfected  
208 after 24 h using the protocol described above. At 0, 1, 2, 3, 4 days post-  
209 transfection, cells were trypsinized (0.05% trypsin/0.02% EDTA in 1x PBS for 5  
210 min at 37°C), washed (PBS 1x ice-cold) and lysed (buffer containing 20%  
211 glycerol, 2% SDS, 125 mM Tris/HCl (pH 6.8), 5% beta-mercaptoethanol, and 0.02  
212 % (w/v) bromphenolblue). After denaturation (95°C for 5 min), samples were  
213 centrifuged (20 000 g for 1 min) and loaded onto a 16% SDS-polyacrylamide gel.  
214 Protein amounts of OP18 and beta-actin were quantified using a primary stathmin  
215 polyclonal antibody (1:1000; Cell Signaling Technology, NEB GmbH,  
216 Frankfurt/Main, Germany) and a polyclonal beta-actin antibody (1:1000; Abcam,  
217 Acris Antibodies, Hiddenhausen, Germany). Primary antibodies were detected by  
218 a secondary anti-rabbit IgG antibody conjugated with horseradish peroxidase  
219 (Dako, Glostrup, Denmark) and visualized via chemiluminescence (Pierce,  
220 Thermo Scientific, Karlsruhe, Germany).

221

## 223 **3 RESULTS**

224

### 225 **3.1 Increased urinary OP18:UPK1A RNA-ratios are associated with invasive**

#### 226 **BCa**

227 Total RNA was prepared from whole urine samples of healthy donors, patients  
228 with urinary tract infections, and patients with BCa. Analysis of urinary RNA of  
229 revealed an RNA signal ratio OP18:UPK1A which is significantly ( $p < 0.001$ )  
230 increased in patients with poorly differentiated (G3) BCa as well as invasive BCa  
231 ( $\geq$  pT2) (Fig. 1 A).

232

#### 233 **Fig 1 Urinary levels of the mRNA-based tumor marker OP18:UPK1A.**

234 **(A)**, Box-Plot of the urinary mRNA ratio OP18:UPK1A. The qRT-PCR-based  
235 detection of OP18- and UPK1A mRNA was performed in triplicate. Donors were  
236 of different health status, including healthy individuals and individuals suffering  
237 from infections of the urinary tract or BCa as stratified according to grade (G1, G2  
238 or G3) and stage, respectively (see Materials and Methods for details). Upper and  
239 lower limits of boxes and lines across boxes indicate the 75<sup>th</sup> and 25<sup>th</sup> percentiles  
240 and median, respectively. Error bars indicate the 90<sup>th</sup> and 10<sup>th</sup> percentiles. White  
241 triangles indicate outlying data points. **(B)**, UPK1A- and OP18 mRNA expression  
242 in human BCa cell lines. Total RNA was prepared in triplicate from ECV-304 and  
243 RT-4 cells in the exponential phase of growth. Absolute mRNA copy numbers of  
244 OP18, UPK1A, and RPLP0 (internal reference mRNA) were determined in  
245 triplicate by qRT-PCR using standard curves. Columns represent mean values  $\pm$

246 standard deviation of UPK1A and OP18 mRNA copies after normalization to  
247 RPLP0 mRNA levels. **(C)**, the abundance of the mRNA-ratio OP18:UPK1A in RT-  
248 4 and ECV-304 (calculated from single mRNA expression profiles as presented in  
249 Fig. 1 B). To compare OP18 to UPK1A-mRNA ratios of three or more patient  
250 groups, the Kruskal-Wallis test (H-test) and for two different patient groups the  
251 unpaired Mann-Whitney-U test was used. For all statistical tests, two-sided P  
252 values  $\leq 0.05$  were considered as statistically significant.

253

254 While UPK1A-specific RNA sequences were less abundant in urine samples from  
255 G3 BCa patients when compared to G2 BCa patients, the high level of urinary  
256 OP18-specific RNA sequences increased with tumor invasiveness, thereby  
257 representing the determining factor for an increased OP18:UPK1A mRNA-ratio  
258 (Fig. 1).

259 Besides the potential suitability of OP18-derived RNA as a urinary marker for  
260 molecular staging, this observation indicated an involvement of OP18 gene  
261 expression in the tumorigenesis of BCa. To test whether model-based G1/G3-  
262 related RNA levels of OP18 and UPK1A were compatible with those in liquid  
263 biopsies, total RNA was prepared from both cell lines: The BCa-derived human  
264 cell lines RT-4 and ECV-304, representing well (G1) and poorly differentiated  
265 (G3) tumor states, respectively. Absolute copy numbers of OP18 and UPK1A as  
266 well as RPLP0 RNA (60S acidic ribosomal protein P0, serving as internal  
267 reference mRNA) were determined via qRT-PCR. This test revealed matching  
268 RNA levels of OP18 and UPK1A, respectively, and suggested the validity of this

269 cell-based system to study the role of OP18 for malignant cell proliferation of  
270 bladder cancer (Fig. 1 B and C).

271

### 272 **3.2 Validation of siRNA tools against OP18 translation**

273 The siRNA (sequences in S2 Table) was tested for suppression of OP18  
274 expression in  $5 \times 10^4$  ECV-304 cells or  $8 \times 10^4$  RT-4 cells. The concentration  
275 dependency of siRNA-mediated suppression of OP18 at the transcriptional level  
276 showed an  $IC_{50}$  value of the most effective OP18-directed siRNA in ECV-304 cells  
277 in the range of 100 pM. Time-dependent siRNA-mediated inhibition of OP18 gene  
278 expression showed strong effects in the G3 model cell line ECV-304, but only  
279 moderate down-regulation of OP18 to levels of 31% at 24 h after transfection in  
280 RT-4 (Fig. 2 A).

281

### 282 **Fig 2 Validation of siRNAs.**

283 The two cell lines RT-4 **(A)** and ECV-304 **(B)** were transfected with OP18-  
284 directed siRNA or control siRNA at 30 nM. Total RNA was prepared after  
285 transfection at the indicated time points and levels of OP18- and RPLP0-mRNA  
286 were detected by qRT-PCR in triplicate. Symbols represent mean relative OP18  
287 mRNA expression  $\pm$  standard deviation as normalized to RPLP0. **(C)**, relative  
288 OP18 protein amount in siRNA-treated ECV-304 cells. Cells were transfected  
289 with control-siRNA or OP18-siRNA (each at 30 nM). At 0, 1, 2, 3, and 4 days after  
290 transfection, cells were lysed, and OP18 protein and beta-actin were detected  
291 using western blotting. Signals of OP18 were normalized to beta-actin.

292 Percentages of OP18 protein suppression in comparison to control cells is  
293 indicated in the lower panel of the blot.

294

295 Thereafter, OP18 mRNA expression increased to the level detected in control-  
296 siRNA treated RT-4 cells. In contrast, in ECV-304 cells, the OP18 expression was  
297 inhibited efficiently to levels of approximately 2% of relative expression (Fig. 2 B).

298 At the OP18 protein level, suppression was investigated for ECV-304 only (Fig. 2  
299 C). A substantial decrease of OP18 protein signal was observed at days 2, 3, and  
300 4 after transfection which relates to 15%, 4%, and 7% suppression, respectively  
301 (as compared to control siRNA).

302

### 303 **3.3 Suppression of OP18 is associated with reduced cell proliferation in** 304 **ECV-304**

305 Next, we investigated a possible correlation of siRNA-mediated suppression of  
306 OP18 and cell proliferation in RT-4 and ECV-304 (Fig. 3).

307

### 308 **Fig 3 Phenotypic characteristics of OP18-suppressed BCa cell lines.**

309 Proliferation rates of untreated RT-4 and ECV-304 **(A)** siRNA-treated RT-4 **(B)**  
310 and siRNA-treated ECV-304 **(C)**. BCa cell lines were transfected in duplicate with  
311 30 nM of OP18-siRNA or control-siRNA. Numbers of viable cells at the indicated  
312 time points after transfection were determined by trypan blue staining. The data  
313 indicate mean values of 3 experiments  $\pm$  standard deviation.

314

315 Analysis of cell growth of untreated and siRNA-treated RT-4 and ECV-304 cells  
316 was conducted. Untreated RT-4 cells had slightly longer doubling times by a  
317 factor of approximately 1.5 compared to ECV-304 (Fig. 3A). After transfection  
318 with functional or control siRNA, RT-4 still displayed nearly similar proliferation  
319 rates (Fig. 3B). Conversely, the proliferation of ECV-304 transfected with OP18-  
320 directed siRNA showed substantially decreased cell proliferation after day 4,  
321 when compared to treatment with control siRNA (Fig. 3C).

322

### 323 **3.4 OP18-suppressed ECV-304 cells undergo apoptosis**

324 To study the potential relationship between OP18 suppression and apoptosis, we  
325 analyzed the expression of apoptosis-related genes, (pro-apoptotic: BAX and  
326 CC3; anti-apoptotic: TC3) after transfection of ECV-304 cells with OP18-directed  
327 siRNA. While the expression level of BAX mRNA did not differ significantly  
328 between OP18-suppressed cells and controls (Fig. 4 A), the pro-apoptotic mRNA  
329 ratio CC3:TC3 increased progressively at day 4 after the suppression of OP18  
330 (Fig. 4 B).

331

### 332 **Fig 4 Apoptotic effects of OP18-suppression in ECV-304.**

333 Relative expression of the pro-apoptotic BAX mRNA **(A)** and increase (‘fold  
334 change’) of the pro-apoptotic mRNA-ratio CC3:TC3 **(B)**. ECV-304 cells were  
335 transfected in duplicate with 30 nM OP18- and control-siRNA and total RNA was  
336 prepared at 1, 2, 3, 4 days after transfection. Levels of BAX, CC3, TC3 and  
337 RPLP0 mRNA were detected in triplicate by qRT-PCR. Data indicate mean



338 values  $\pm$  standard deviation and are representative of three independent  
339 experiments. **(C)**, induction of caspase 3/7 activity after suppression of OP18.  
340 ECV-304 cells were transfected in triplicate with OP18- and control-siRNA (each  
341 30 nM) and the relative caspase 3/7 activity as normalized to cell viability was  
342 quantified at day 3 and 4 after transfection. Data indicate mean values  $\pm$  standard  
343 deviation and are representative of three independent experiments.

344

345 To further investigate the induction of apoptosis in OP18-suppressed ECV-304,  
346 relative caspase 3/7 activity was determined at the protein level (Fig. 4 C). At day  
347 3 and 4 after transfection, caspase 3/7 activity was enhanced by 2.5- and 3.5-  
348 fold, respectively.

349

### 350 **3.5 Suppression of OP18 increases chemo-sensitivity in ECV-304**

351 In a more therapeutically oriented perspective, the role of OP18 in sensitivity of  
352 ECV-304 for the chemotherapeutic agent cisplatin was studied (Fig. 5).

353

### 354 **Fig 5 Chemo-sensitivity of BCa cells after suppression of OP18.**

355 ECV-304 cells were transfected in triplicate with each 30 nM of OP18- and control  
356 siRNA. **(A)**, cell viability of siRNA-treated ECV-304 cells. The viability of ECV-304  
357 cells was quantified with the colorimetric MTS-assay at 1, 2, 3, 4 days after  
358 transfection in triplicate (30 nM OP18- and control-siRNA). Symbols indicate  
359 mean values  $\pm$  standard deviation of three independent experiments. **(B)** Cells  
360 were treated for 24 h with different concentrations of cisplatin (0, 1, 3, 6, 9, and

361 12 µg/ml) 48 h after transfection followed by quantification of cell viability. Data  
362 indicate mean values ± standard deviation and are representative of three  
363 independent experiments.

364

365 Analysis of cell viability of OP18-suppressed ECV-304 cells showed a decrease  
366 of 35% at day 4 after transfection with functional siRNA when compared to cells  
367 transfected with control siRNA (Fig. 5B).

368 Subsequently, ECV-304 cells were exposed to varying concentrations of cisplatin  
369 for 24 h at day 2 post-transfection with siRNA. Notably, treatment with cisplatin  
370 had an additive effect on loss in relative viability in ECV-304: At high  
371 concentrations of cisplatin (9 and 12 µg/ml), a progressively severe effect was  
372 observed on cell viability of OP18-suppressed cells as compared to controls. At a  
373 cisplatin concentration of 12 µg/ml, the decrease in cell viability of OP18-  
374 suppressed ECV-304 cells was in the order of one magnitude while in the  
375 absence of cisplatin, this was only approximately twofold (Fig. 3C and Fig. 5, “0”  
376 cisplatin). At low concentrations of cisplatin (1, 3 and 6 µg/ml), the effect on  
377 relative cell viability was similar in OP18-suppressed cells and controls.

378

## 380 **4 DISCUSSION**

381

### 382 **4.1 This study provides functional insights into the biological role of OP18** 383 **and its involvement in malignant cell proliferation.**

384 Prognostic value has been assigned to OP18 in different tumor entities as based  
385 on tissue biopsies [17-20]. Recently, Hemdan *et al.* investigated the role of OP18  
386 in BCa [21]. In line with the present study, they used siRNAs, but a commercial  
387 set of siRNAs, not overlapping with the designed siRNAs used in this study for  
388 suppression of OP18 mRNA, supporting our findings.

389 In contrast to Hemdan *et al.*, we used liquid biopsies, two cell culture models and  
390 molecular analyzes rather than tissues and histopathological staining. The use of  
391 whole urine samples is advantageous because urine is readily available and can  
392 be collected in high frequency, e.g. to monitor patients with BCa with a relatively  
393 high recurrence rate. Moreover, molecular markers can be detected in a  
394 standardized manner by qPCR, whereas histopathological examinations of tumor  
395 tissue strongly depend on the pathologist or pattern recognition imaging software.

396

### 397 **4.2 OP18 as potential therapeutic bladder cancer target and tumor marker**

398 The suppression of OP18 by siRNA was observed on the levels of mRNA and  
399 protein which suggests to further test a wide repertoire of inhibitors to  
400 therapeutically address more advanced tumor stages of bladder cancer to less  
401 malignant stages. We anticipate that instillation of drugs into the bladder  
402 produces a scenario of drug application that is closer to a local rather than a

403 systemic application which implies several fundamental advantages such as  
404 increased local concentration, i.e., increased delivery to tumor cells, higher  
405 stability, and decreased side effects.

406 This study strongly suggests OP18 to be a molecular marker and a cause for the  
407 disease. We assume that OP18-specific RNA contained at elevated amounts in  
408 the urine of BCa patients at advanced tumor stages reflects increased OP18  
409 expression levels in tumor tissue. It is reasonable that OP18 serves as a tumor  
410 marker closely related to malign molecular events, rather than indirectly reflects a  
411 tumorigenic cellular process. Thereby, OP18-specific RNA as a marker directly  
412 monitors the disease. Further, to improve sensitivity and specificity of this marker,  
413 combinations of markers in the line of OP18-specific RNA might even give rise to  
414 substantially improved diagnostics of BCa and in a non-invasive setting. For  
415 example, the analysis of urinary mRNAs in this study revealed an improved  
416 relationship between the mRNA-ratio OP18/UPK1A and poorly differentiated (G3)  
417 and muscle-invasive ( $\geq$  pT2) BCa cancer states. Our data strongly indicate that  
418 this strategy has great potential for future accurate and non-invasive diagnostic  
419 developments in case of bladder cancer and beyond.

420

## 421 **5 CONCLUSIONS**

422 OP18 expression seems to be necessary for malignant cell proliferation in human  
423 cells derived from bladder cancer. In a diagnostic perspective, urine RNA levels  
424 (OP18:UPK1A) serve as a molecular marker for the invasive disease. In  
425 mechanistic terms, over-expression of OP18 seems to be necessary for

426 maintaining the malignant state of BCa cells as its suppression results in an  
427 increased chemo-sensitivity and apoptosis. Hence, the gene expression of OP18  
428 represents a rational therapeutic target and diagnostic readout.

429

## 430 **6 ACKNOWLEDGEMENTS**

431 We thank Drs. C. Höppner, M. Horn, T. Menke, S. Thomas, and J. Träder for  
432 collecting samples, B. Thode and B. Branke for technical assistance.

433

## 434 **7 REFERENCES**

- 435 1. von der Maase H, Hansen SW, Roberts JT, Dogliotti L, Oliver T, Moore MJ, et  
436 al. Gemcitabine and cisplatin versus methotrexate, vinblastine, doxorubicin,  
437 and cisplatin in advanced or metastatic bladder cancer: results of a large,  
438 randomized, multinational, multicenter, phase III study. *J Clin Oncol Off J Am*  
439 *Soc Clin Oncol*. 2000 Sep;18(17):3068–77.
- 440 2. Loehrer PJ, Einhorn LH, Elson PJ, Crawford ED, Kuebler P, Tannock I, et al.  
441 A randomized comparison of cisplatin alone or in combination with  
442 methotrexate, vinblastine, and doxorubicin in patients with metastatic  
443 urothelial carcinoma: a cooperative group study. *J Clin Oncol Off J Am Soc*  
444 *Clin Oncol*. 1992 Jul;10(7):1066–73.
- 445 3. Duggan BJ, Gray S, Johnston SR, Williamson K, Miyaki H, Gleave M. The  
446 role of antisense oligonucleotides in the treatment of bladder cancer. *Urol*  
447 *Res*. 2002 Jul;30(3):137–47.
- 448 4. Miyake H, Nelson C, Rennie PS, Gleave ME. Acquisition of Chemoresistant  
449 Phenotype by Overexpression of the Antiapoptotic Gene Testosterone-  
450 repressed Prostate Message-2 in Prostate Cancer Xenograft Models. *Cancer*  
451 *Res*. 2000 May 1;60(9):2547–54.
- 452 5. Wang C, Ge Q, Zhang Q, Chen Z, Hu J, Li F, et al. Targeted p53 activation by  
453 saRNA suppresses human bladder cancer cells growth and metastasis. *J Exp*  
454 *Clin Cancer Res CR*. 2016 Mar 25;35.
- 455 6. Lei Y, Hu X, Li B, Peng M, Tong S, Zu X, et al. miR-150 modulates cisplatin  
456 chemosensitivity and invasiveness of muscle-invasive bladder cancer cells via

- 457 targeting PDCD4 in vitro. *Med Sci Monit Int Med J Exp Clin Res*. 2014 Oct  
458 7;20:1850–7.
- 459 7. Malentacchi F, Vinci S, Melina AD, Kuncova J, Villari D, Nesi G, et al. Urinary  
460 carbonic anhydrase IX splicing messenger RNA variants in urogenital  
461 cancers. *Urol Oncol*. 2016;34(7):292.e9-292.e16.
- 462 8. Ismail MF, El Boghdady NA, Shabayek MI, Awida HA, Abozeed H. Evaluation  
463 and screening of mRNA S100A genes as serological biomarkers in different  
464 stages of bladder cancer in Egypt. *Tumour Biol J Int Soc Oncodevelopmental  
465 Biol Med*. 2016 Apr;37(4):4621–31.
- 466 9. Urquidi V, Netherton M, Gomes-Giacoia E, Serie DJ, Eckel-Passow J, Rosser  
467 CJ, et al. A microRNA biomarker panel for the non-invasive detection of  
468 bladder cancer. *Oncotarget*. 2016 Dec 27;7(52):86290–9.
- 469 10. Hanke M, Kausch I, Dahmen G, Jocham D, Warnecke JM. Detailed  
470 technical analysis of urine RNA-based tumor diagnostics reveals  
471 ETS2/urokinase plasminogen activator to be a novel marker for bladder  
472 cancer. *Clin Chem*. 2007 Dec;53(12):2070–7.
- 473 11. Hanke M, Hoefig K, Merz H, Feller AC, Kausch I, Jocham D, et al. A robust  
474 methodology to study urine microRNA as tumor marker: microRNA-126 and  
475 microRNA-182 are related to urinary bladder cancer. *Urol Oncol*. 2010  
476 Dec;28(6):655–61.
- 477 12. Dirks WG, MacLeod RA, Drexler HG. ECV304 (endothelial) is really T24  
478 (bladder carcinoma): cell line cross- contamination at source. *In Vitro Cell Dev  
479 Biol Anim*. 1999 Dec;35(10):558–9.
- 480 13. Drexler HG, Quentmeier H, Dirks WG, MacLeod RAF. Bladder carcinoma  
481 cell line ecv304 is not a model system for endothelial cells. *Vitro Cell Dev Biol  
482 - Anim*. 2002 Apr 1;38(4):185–6.
- 483 14. MacLeod RA, Dirks WG, Matsuo Y, Kaufmann M, Milch H, Drexler HG.  
484 Widespread intraspecies cross-contamination of human tumor cell lines  
485 arising at source. *Int J Cancer*. 1999 Nov 12;83(4):555–63.
- 486 15. Rigby CC, Franks LM. A human tissue culture cell line from a transitional  
487 cell tumour of the urinary bladder: growth, chromosome pattern and  
488 ultrastructure. *Br J Cancer*. 1970 Dec;24(4):746–54.
- 489 16. Far RK, Nedbal W, Sczakiel G. Concepts to automate the theoretical  
490 design of effective antisense oligonucleotides. *Bioinforma Oxf Engl*. 2001  
491 Nov;17(11):1058–61.

- 492 17. Yuan R-H, Jeng Y-M, Chen H-L, Lai P-L, Pan H-W, Hsieh F-J, et al.  
493 Stathmin overexpression cooperates with p53 mutation and osteopontin  
494 overexpression, and is associated with tumour progression, early recurrence,  
495 and poor prognosis in hepatocellular carcinoma. *J Pathol.* 2006  
496 Aug;209(4):549–58.
- 497 18. Curmi PA, Noguès C, Lachkar S, Carelle N, Gonthier MP, Sobel A, et al.  
498 Overexpression of stathmin in breast carcinomas points out to highly  
499 proliferative tumours. *Br J Cancer.* 2000 Jan;82(1):142–50.
- 500 19. Baquero MT, Hanna JA, Neumeister V, Cheng H, Molinaro AM, Harris LN,  
501 et al. Stathmin expression and its relationship to microtubule-associated  
502 protein tau and outcome in breast cancer. *Cancer.* 2012 Oct 1;118(19):4660–  
503 9.
- 504 20. Xi W, Rui W, Fang L, Ke D, Ping G, Hui-Zhong Z. Expression of  
505 stathmin/op18 as a significant prognostic factor for cervical carcinoma  
506 patients. *J Cancer Res Clin Oncol.* 2008 Dec 1;135:837–46.
- 507 21. Hemdan T, Lindén M, B Lind S, V Namuduri A, Sjöstedt E, D de Ståhl T, et  
508 al. The prognostic value and therapeutic target role of stathmin-1 in urinary  
509 bladder cancer. *Br J Cancer.* 2014 Sep 9;111(6):1180–7.

510  
511

## 512 **8 SUPPORTING INFORMATION CAPTIONS**

513 S1 Table: Sequences and characteristics of qPCR amplicons

514 S2 Table: Most effective siRNA sequence and scrambled RNA sequence

515

## Figure 1

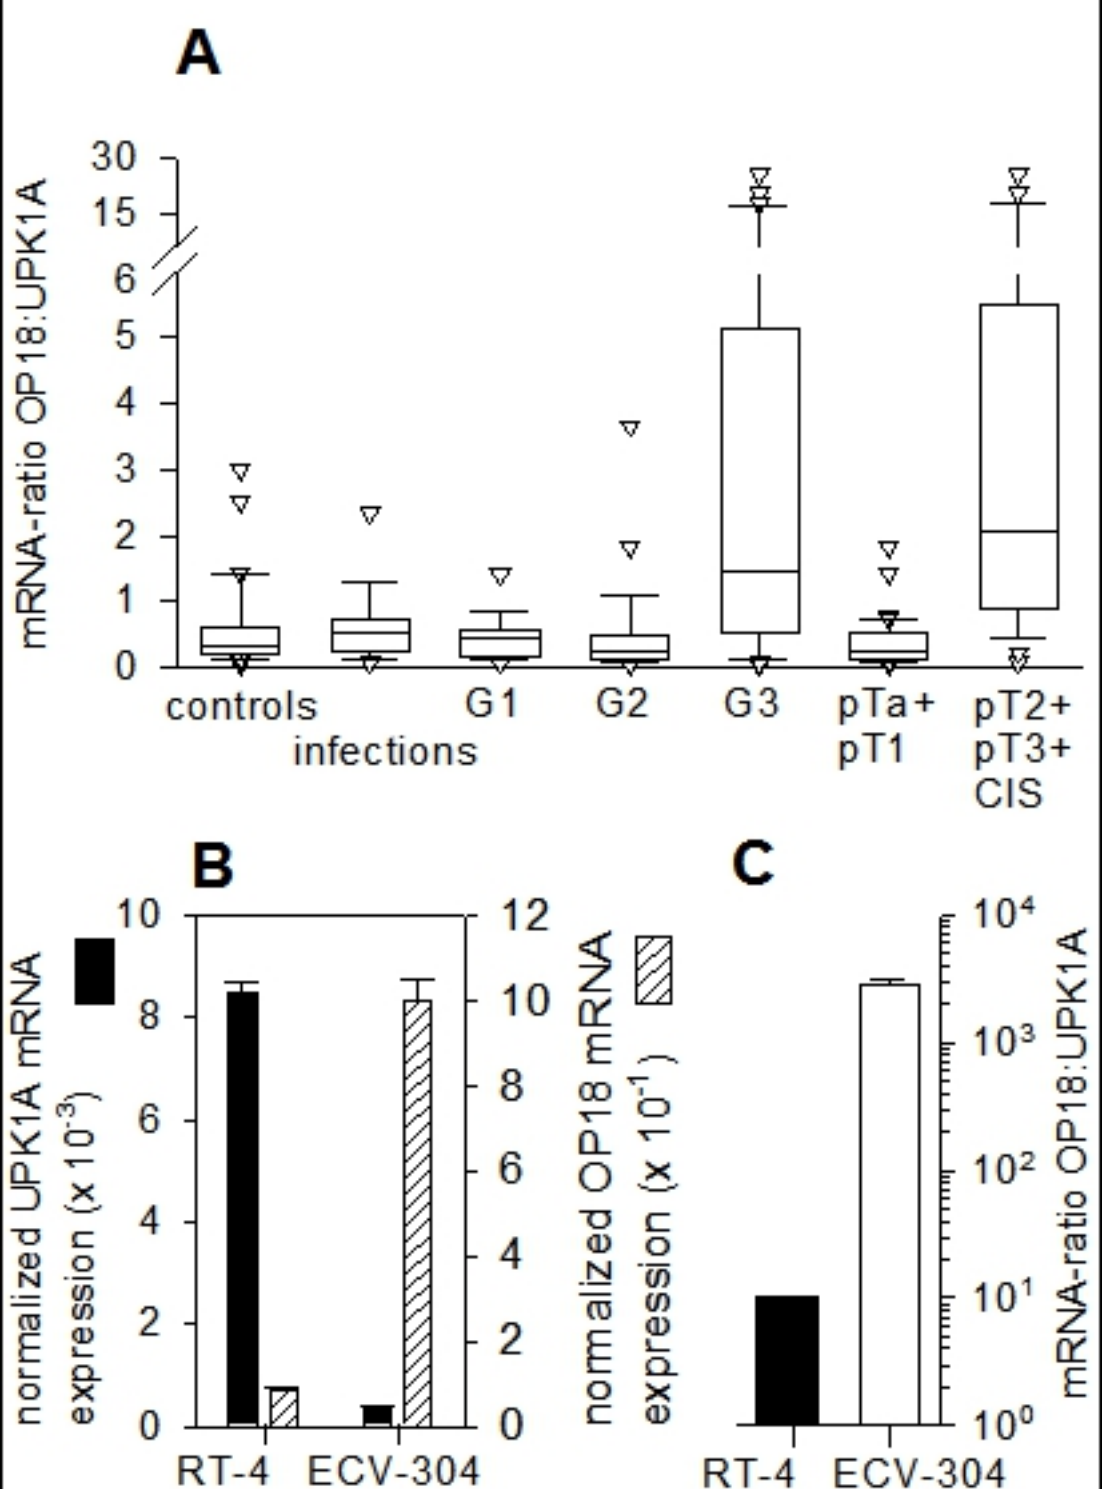

Figure



# Figure 2

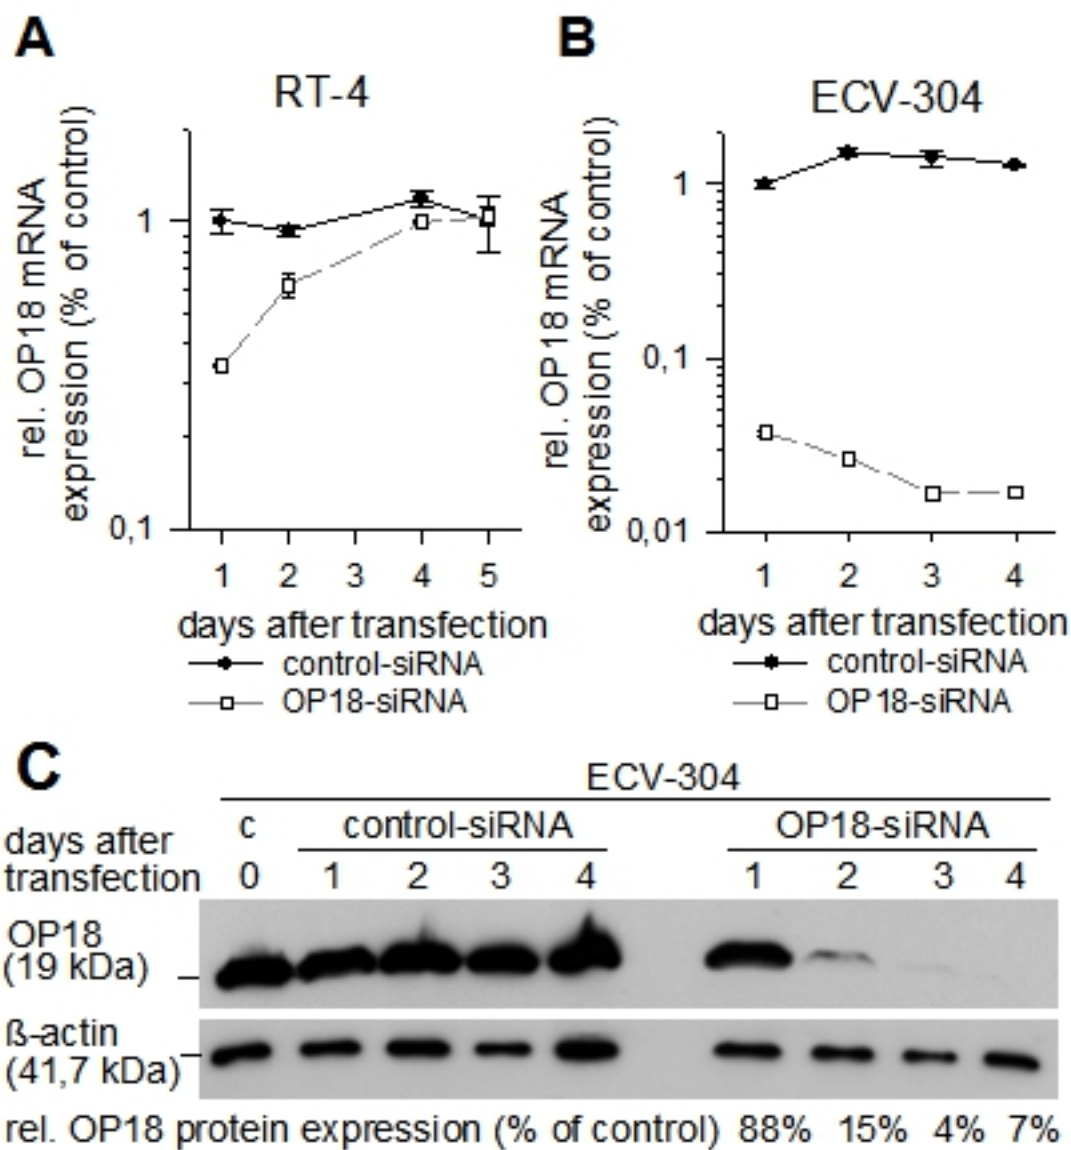

Figure

**Figure 3**

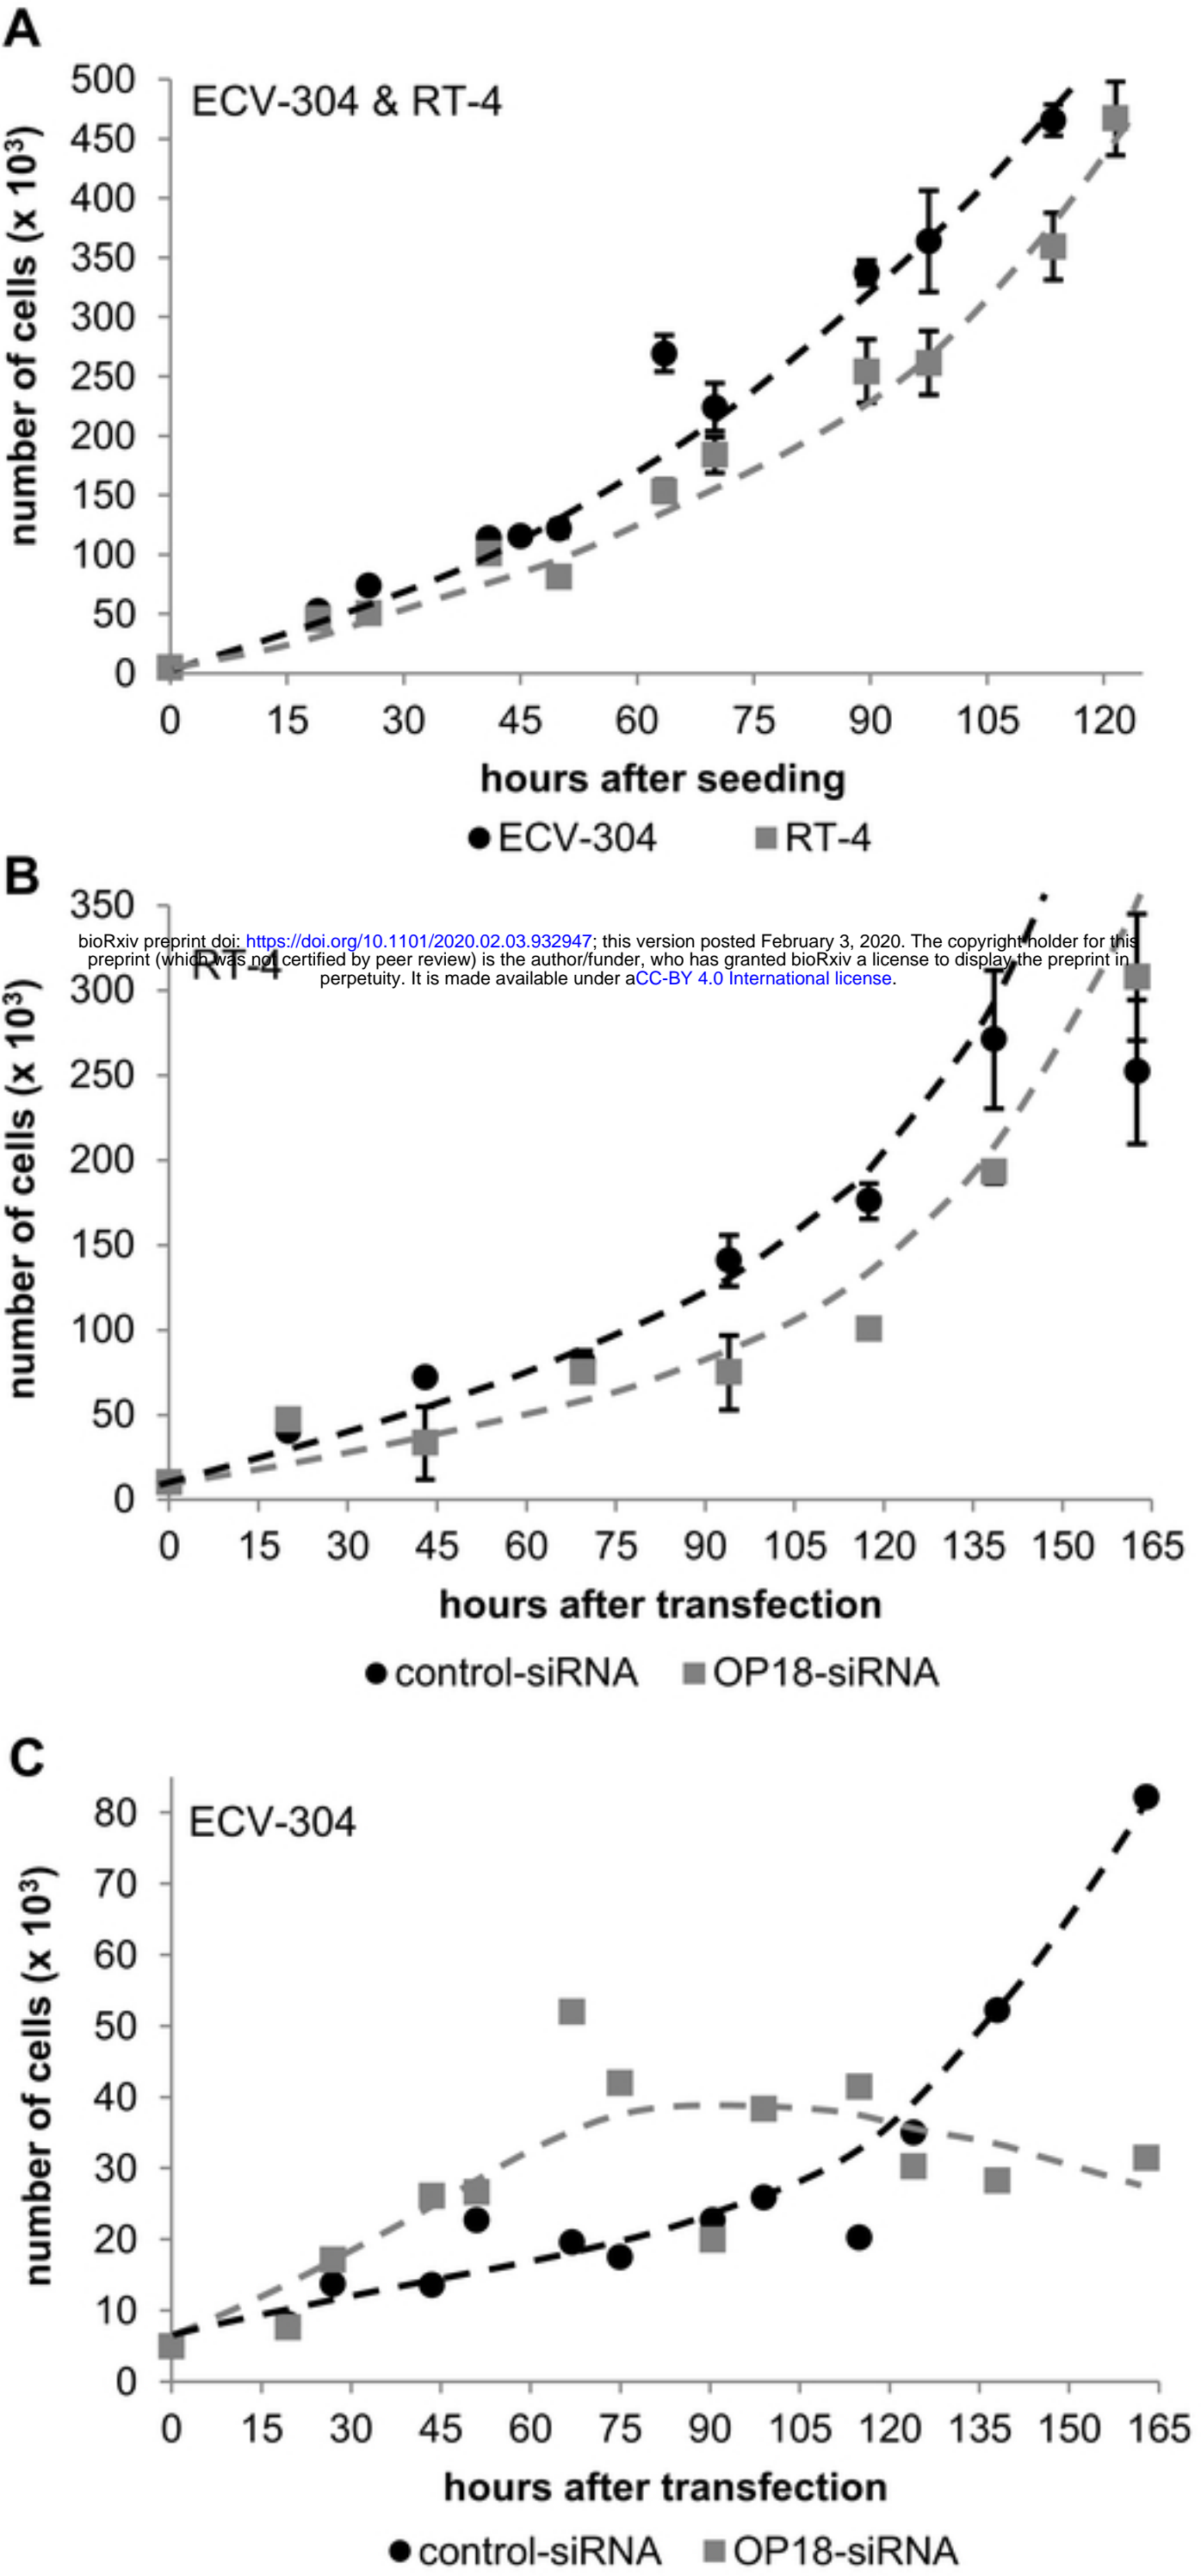

Figure

**Figure 4**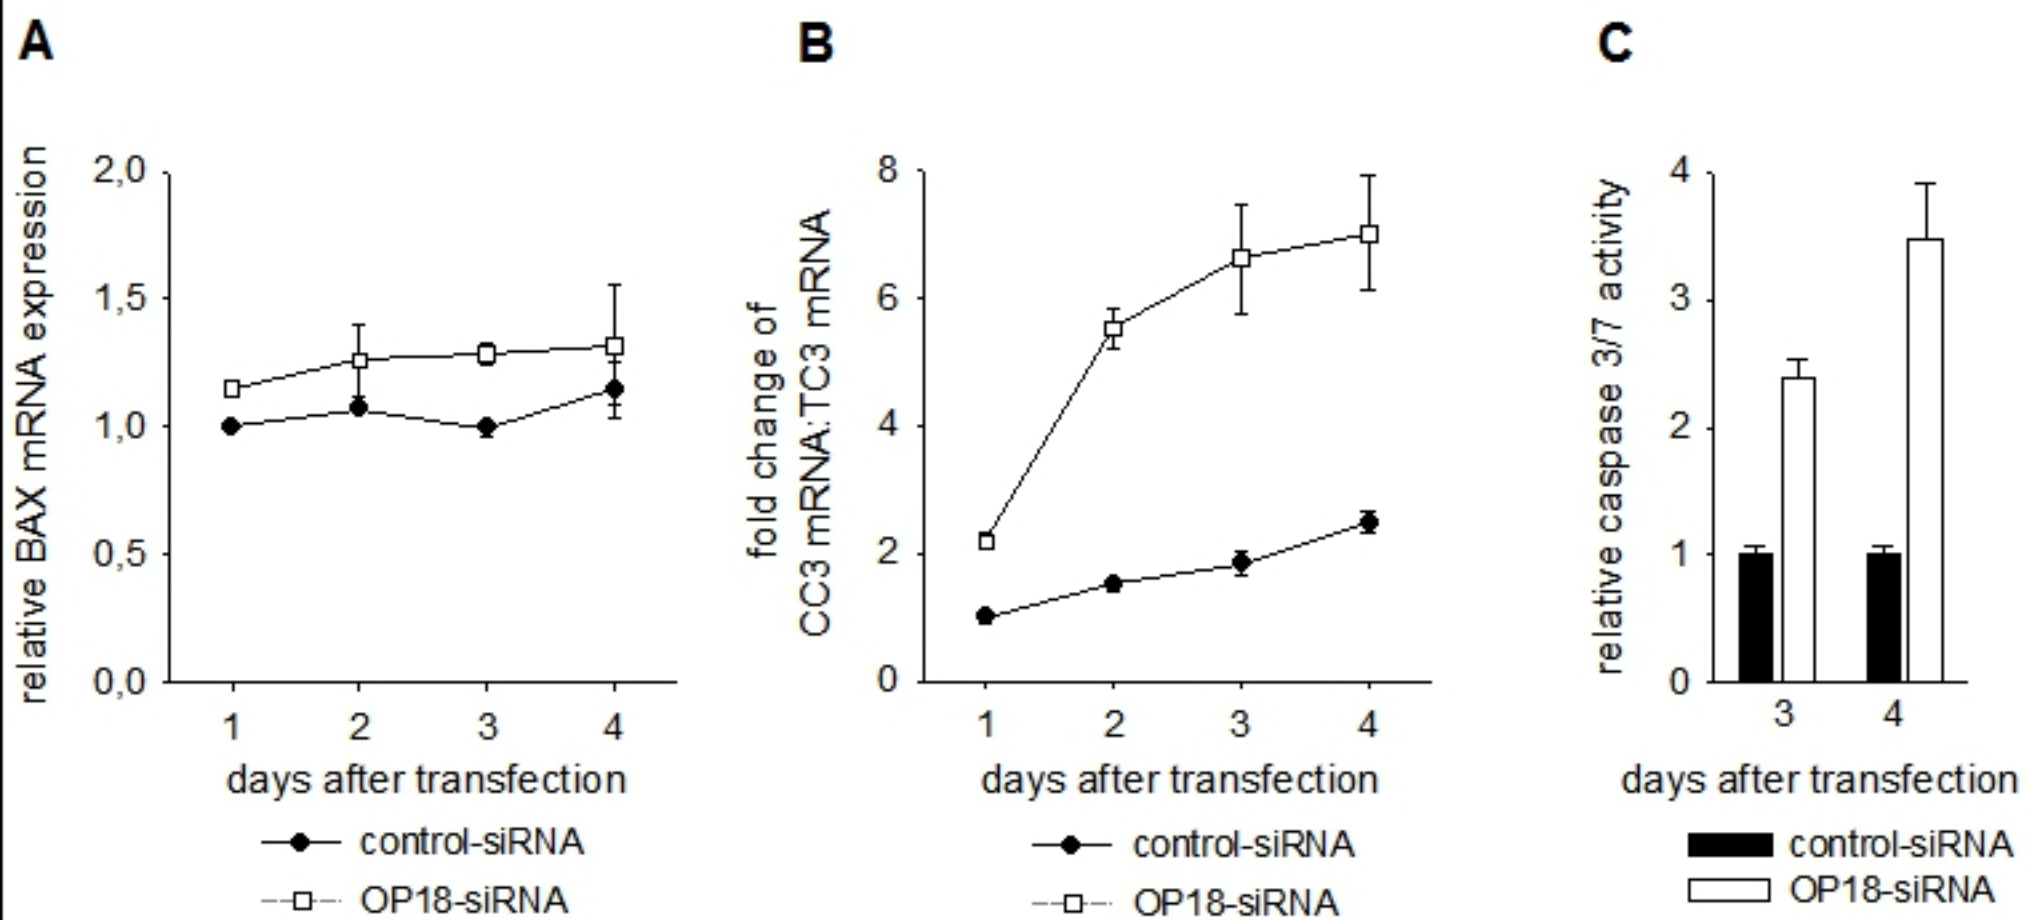**Figure**

**Figure 5**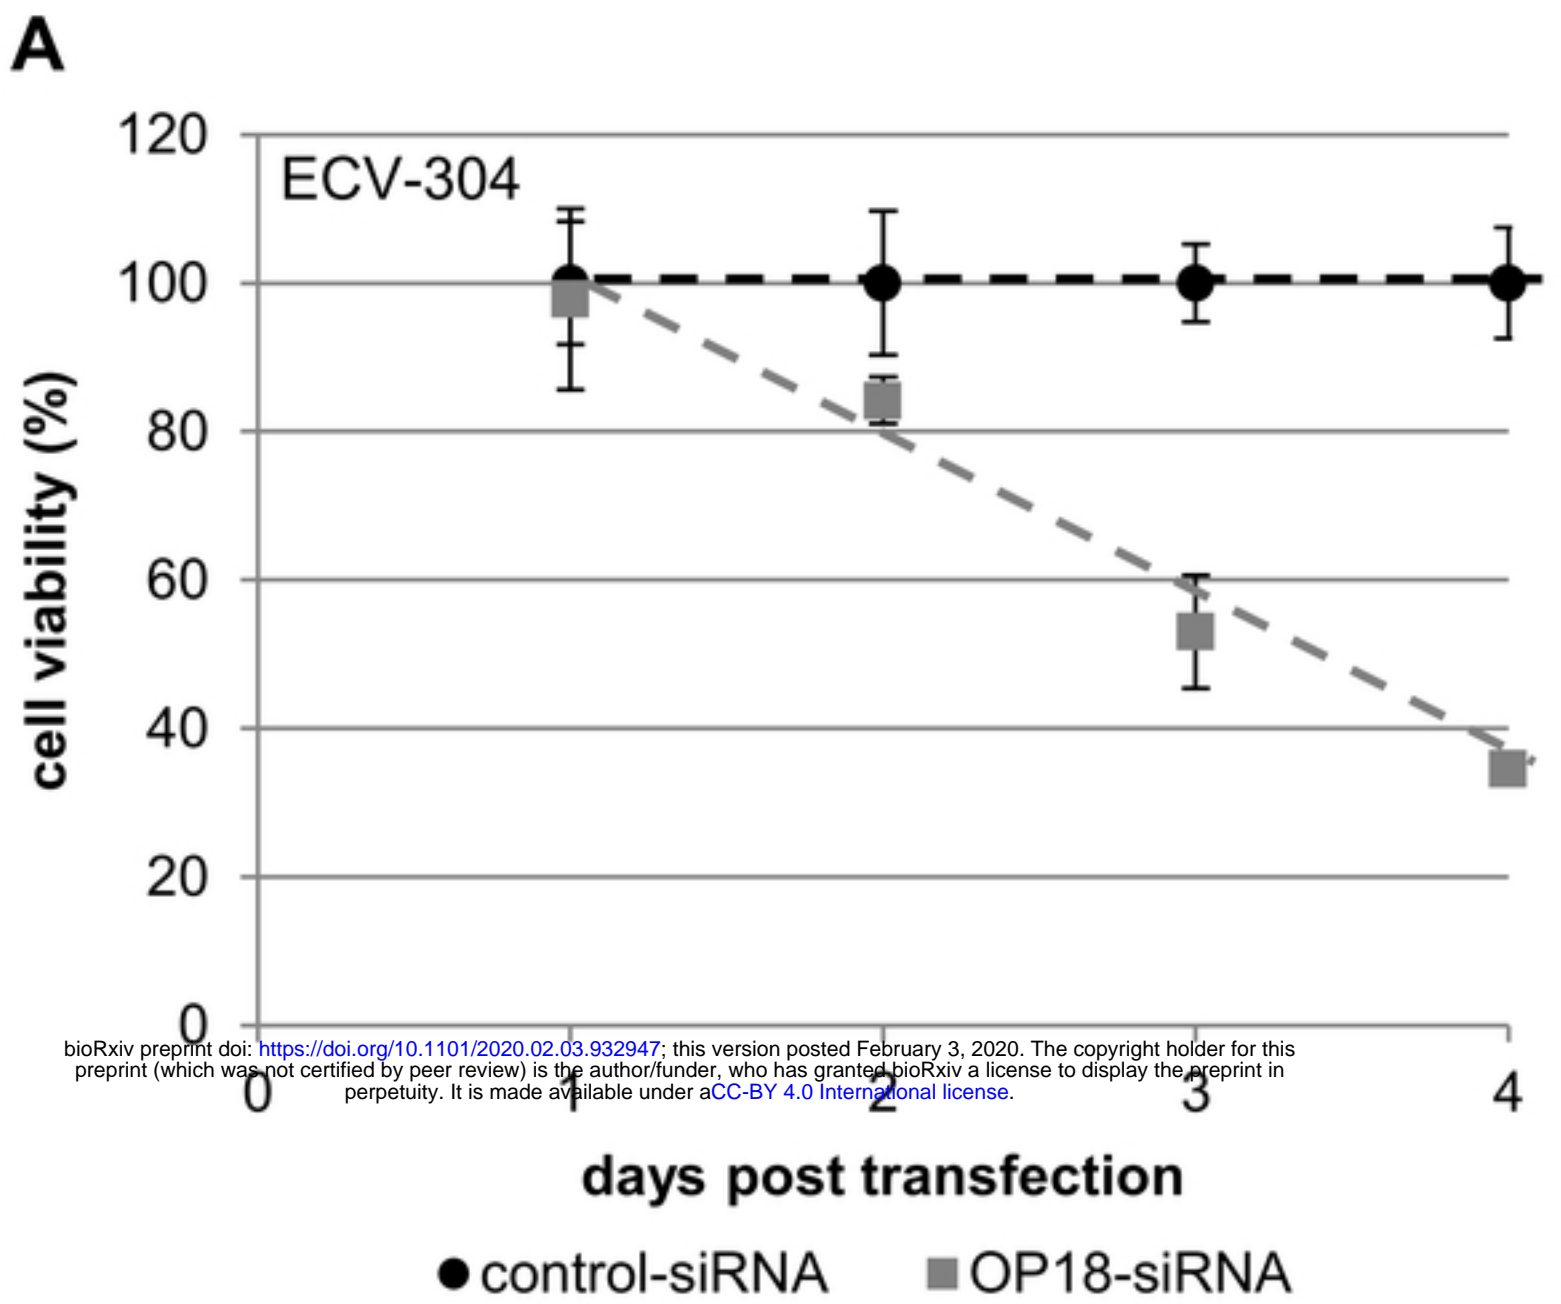

bioRxiv preprint doi: <https://doi.org/10.1101/2020.02.03.932947>; this version posted February 3, 2020. The copyright holder for this preprint (which was not certified by peer review) is the author/funder, who has granted bioRxiv a license to display the preprint in perpetuity. It is made available under aCC-BY 4.0 International license.

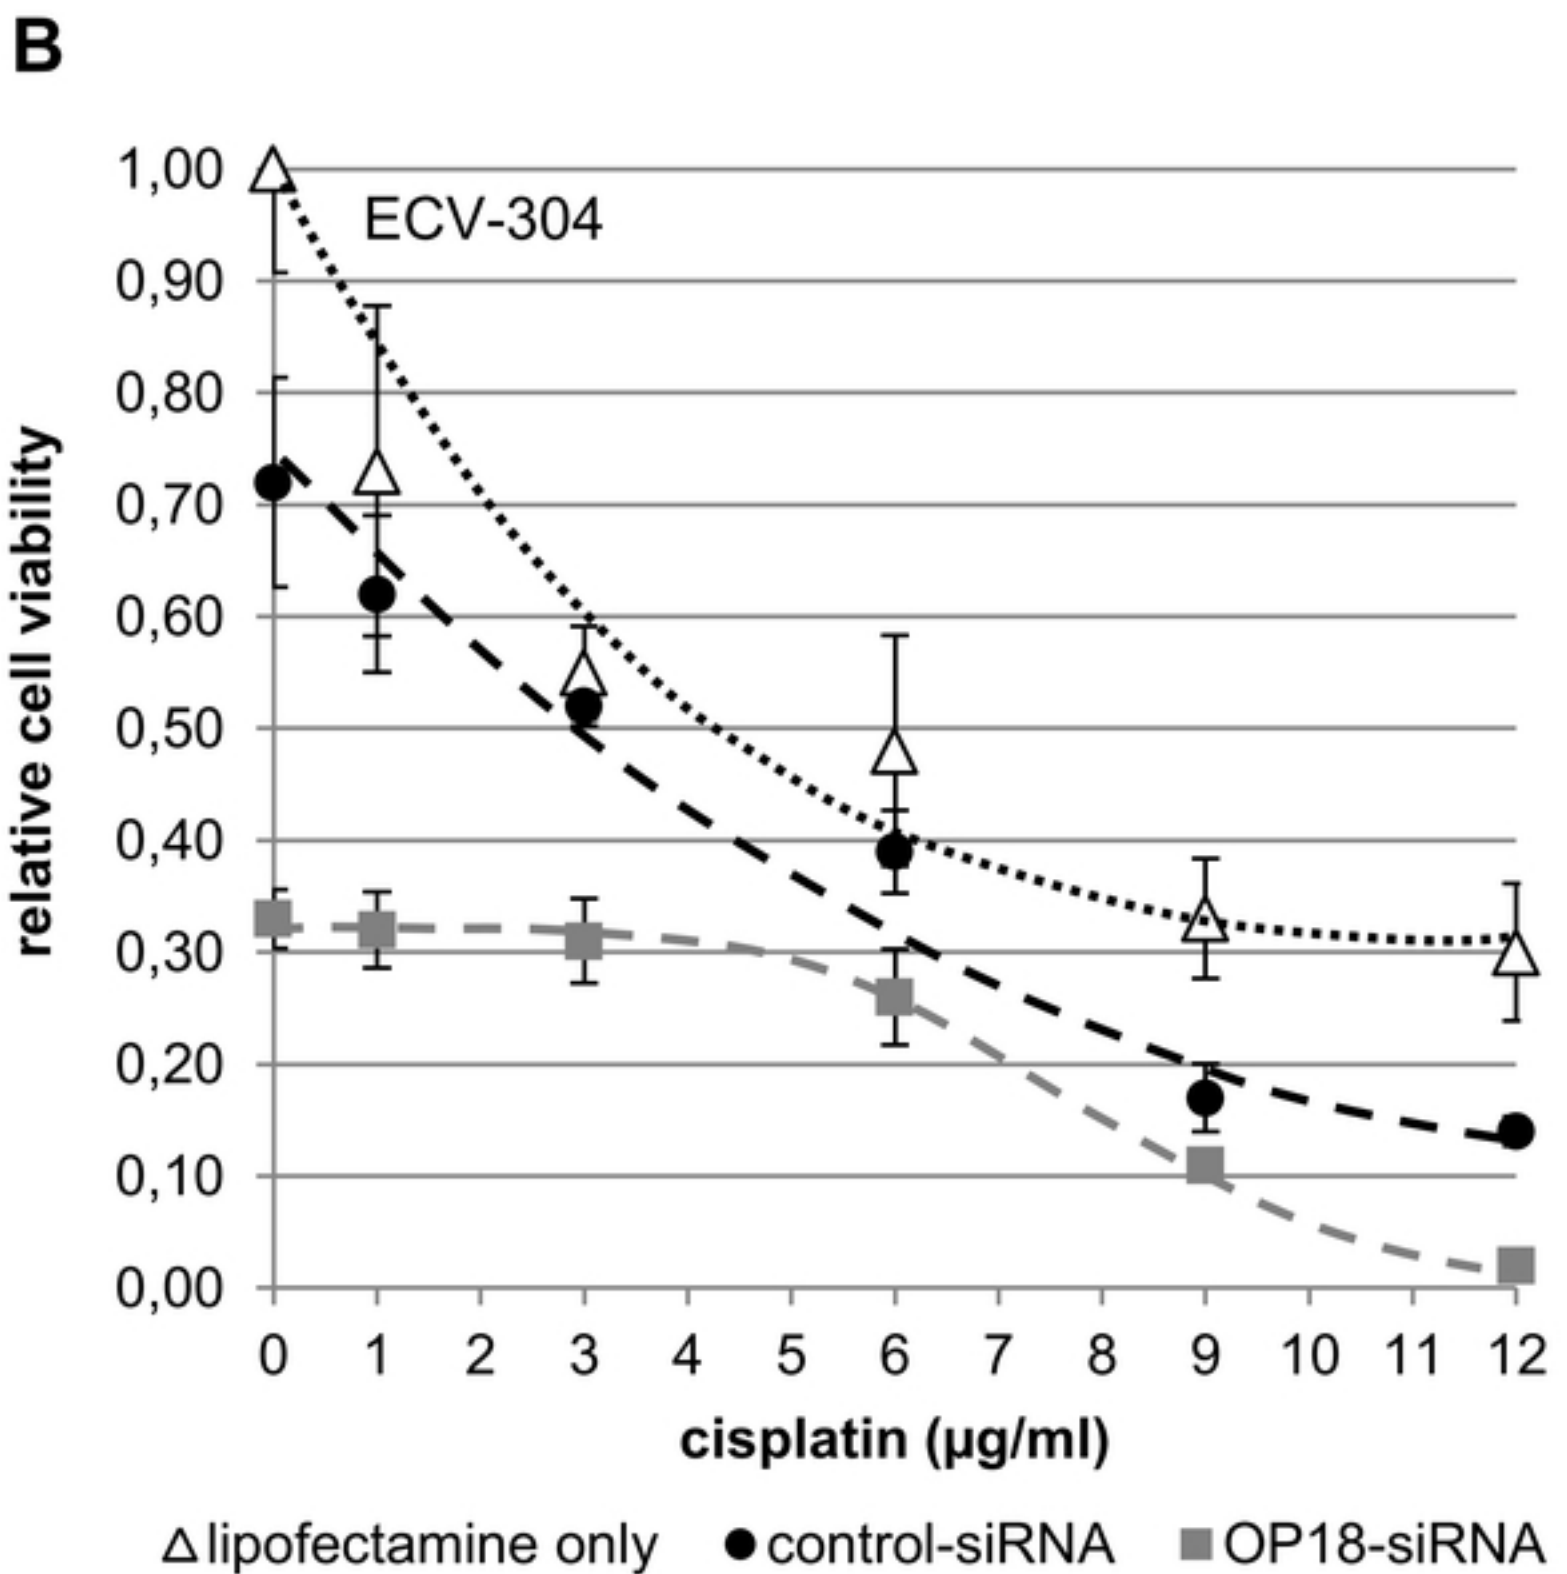**Figure**
